# Supplementary material for: Developing a set of consensus indicators to support maternity service quality improvement: using Core Outcome Set methodology including a Delphi process
Source: PubMed Central journal article supplement — BJOG. 2018 Jun 14;125(12):1612–8. doi: 10.1111/1471-0528.15282 (PMC6220866; doi:10.1111/1471-0528.15282), 2018-06-14
Supplement: BJO-125-1612-s001.pdf [file BJO-125-1612-s001.pdf]

**Table S1.** Candidate metrics scored in Phases 1 and 2 of the Delphi Process

|                                    | Metric                                                                                                                             | Definition or explanatory text                                                                                                                                                                                                          |
|------------------------------------|------------------------------------------------------------------------------------------------------------------------------------|-----------------------------------------------------------------------------------------------------------------------------------------------------------------------------------------------------------------------------------------|
| <b>Antenatal Provision Metrics</b> | Number of bookings                                                                                                                 | Number of women attending booking appointments                                                                                                                                                                                          |
|                                    | Number of bookings by 12 weeks + 6 days                                                                                            | Number of women who attended for booking appointments by 12 weeks + 6 days                                                                                                                                                              |
|                                    | Total number of babies born                                                                                                        | Number of babies born, which includes all registerable live births and all still births                                                                                                                                                 |
|                                    | Number of live births                                                                                                              | All babies born of any gestation with outcome of live birth, i.e. all registered live births                                                                                                                                            |
|                                    | Number of live births at term                                                                                                      | Number of live births $\geq$ 37 weeks gestation                                                                                                                                                                                         |
|                                    | Number of birth episodes (women delivered)                                                                                         | Number of women who gave birth (either registered live birth or still birth)                                                                                                                                                            |
|                                    | Birth episode rate by place of birth                                                                                               | Proportion of women who gave birth this month (as above), in each of the following five places: Home (planned homebirths), alongside midwife-led unit, free-standing midwife-led unit, consultant-led delivery unit/labour ward, other. |
|                                    | Number of planned home births                                                                                                      | Number of women who are booked for home birth by the service                                                                                                                                                                            |
|                                    | Number of planned home births achieved                                                                                             | Number of women who achieved a planned home birth                                                                                                                                                                                       |
|                                    | Number of unplanned home births                                                                                                    | Number of women who gave birth at home who did not have a home birth planned. (This ensures the capture of hospital planned births and concealed pregnancies.)                                                                          |
|                                    | Water Births                                                                                                                       | Number of women giving birth in water                                                                                                                                                                                                   |
|                                    | Transfers of antenatal care between providers at any point - arising from the woman's choice                                       | Number of women who transfer care at any stage in the antenatal period from one lead provider to another lead provider arising from maternal choice.                                                                                    |
|                                    | Transfers of antenatal care between providers at any point - because of level of care needed (e.g. fetal medicine services needed) | Number of women who transfer care at any stage in the antenatal period from one lead provider to another lead provider because of level of care needed.                                                                                 |
|                                    | Transfer of Care in Labour - planned homebirth to secondary care                                                                   | Number of women who have a planned homebirth who are transferred to secondary care.                                                                                                                                                     |
|                                    | Transfer of Care in Labour - due to an emergency or on maternal request (e.g. for epidural)                                        | Number of women who are transferred in labour due to an emergency or on maternal request (e.g. for epidural).                                                                                                                           |
|                                    | Transfer of Care in Labour - Low risk Women transferred to high risk facilities.                                                   | Number of women considered to be at low risk who are then transferred to high risk facilities. This could be in the same building or from free standing MLU.                                                                            |

|                                        |                                                                              |                                                                                                                                                                                                                                                             |
|----------------------------------------|------------------------------------------------------------------------------|-------------------------------------------------------------------------------------------------------------------------------------------------------------------------------------------------------------------------------------------------------------|
|                                        | Transfer of Care in Labour - from one provider to another.                   | Number of women who are transferred from one provider to another due to lack of facilities e.g. neonatal services or unit closure.                                                                                                                          |
|                                        | Midwife to birth ratio                                                       | Number of births per Whole Time Equivalent midwife as calculated locally by each Provider (Based on clinical midwifery contributions only; excluding midwives in a management, governance or service development role)                                      |
|                                        | Unit closures                                                                | The number of days in the month the maternity unit is closed to admissions.                                                                                                                                                                                 |
|                                        | Capping of admissions                                                        | The number of days in the month capping of bookings to the maternity unit occurs.                                                                                                                                                                           |
| <b>Additional Metrics for Phase 2</b>  | Births in midwife led environments                                           | Proportion of births in midwife led environments                                                                                                                                                                                                            |
|                                        | Women booking to midwife led environments                                    | Proportion of women booking to midwife led environments                                                                                                                                                                                                     |
| <b>Perinatal Mental Health Metrics</b> | Emotional Health and wellbeing screening at booking                          | Proportion of women who have been screened for emotional health and well-being at booking in line with the Maternal Mental Health Pathway based on NICE CG 192                                                                                              |
|                                        | Information provided about emotional health and well-being at booking        | Proportion of women who have been given information from the local maternity provider about emotional health and well-being at booking in line with the Maternal Mental Health Pathway based on NICE CG 192                                                 |
|                                        | Information about emotional health and wellbeing at first post-natal contact | Proportion of women who have been given information from the local maternity provider about emotional health and well-being at first post-natal contact with health care professional, in line with the Maternal Mental Health Pathway based on NICE CG 192 |
|                                        | Women with severe mental illness - at least 2 planning meetings              | In line with the Maternal Mental Health Pathway based on NICE CG 192, proportion of women with severe mental health illness to have received at least two planning meetings.                                                                                |
|                                        | Women with severe mental illness - birth plan in place by 35 weeks.          | In line with the Maternal Mental Health Pathway based on NICE CG 192, proportion of women with severe mental health illness with a birth plan in place by 35 weeks.                                                                                         |
| <b>Additional metric for Phase 2</b>   | Postnatal depression, psychosis and suicide                                  | Proportion of women diagnosed with postnatal depression, psychosis or committing suicide                                                                                                                                                                    |
| <b>Maternal Metrics</b>                | Induction of labour rate                                                     | The proportion of women who gave birth that had their labour induced at $\geq 24$ weeks gestation                                                                                                                                                           |
|                                        | Inductions at term +12 days                                                  | The proportion of women who gave birth that had their labour induced $\geq 41$ weeks +5 days gestation                                                                                                                                                      |
|                                        | Non-instrumental vaginal birth rate                                          | Proportion of babies born by non-instrumental, vaginal birth (i.e. not caesarean, forceps or ventouse) at $\geq 24$ weeks gestation                                                                                                                         |

|                                                                                     |                                                                                                                                                                                                                                                                 |
|-------------------------------------------------------------------------------------|-----------------------------------------------------------------------------------------------------------------------------------------------------------------------------------------------------------------------------------------------------------------|
| SVD physiological 3rd stage                                                         | Spontaneous Vertex Delivery physiological third stage.                                                                                                                                                                                                          |
| Instrumental births                                                                 | The proportion of babies born by instrumental delivery $\geq 24$ weeks gestation.                                                                                                                                                                               |
| Emergency caesarean section after failed instrumental delivery                      | The proportion of babies born by emergency C-section following a failed instrumental delivery at $\geq 24$ weeks gestation.                                                                                                                                     |
| Multiple births                                                                     | Proportion of babies that are twins, triplets, or higher order multiples.                                                                                                                                                                                       |
| Total caesarean section rate                                                        | The proportion of babies born via caesarean section at $\geq 24$ weeks                                                                                                                                                                                          |
| Elective caesarean section rate                                                     | The proportions of babies born via elective caesarean section (category 4) in the following two categories: $\geq 39$ weeks gestational age and $\geq 24$ but $< 39$ weeks.                                                                                     |
| Caesarean section rate in Robson group 1 women                                      | The proportion of all women assessed to be in Robson group 1 who gave birth by caesarean section. (Robson group 1 = primips, singleton, cephalic, $\geq 37$ weeks, spontaneous labour)                                                                          |
| Maternal requests for c/s                                                           | Proportion of women delivered by C-section at maternal request $\geq 24$ weeks gestational age                                                                                                                                                                  |
| Number of LSCS at full dilation                                                     | Number of LSCS performed at full dilation                                                                                                                                                                                                                       |
| Emergency caesarean section rate                                                    | The proportions of babies born via emergency caesarean section (categories 1-3) in the following two categories: $\geq 39$ weeks gestational age and $\geq 24$ but $< 39$ weeks.                                                                                |
| 2nd degree tear rate                                                                | Proportion of all women who sustained a 2nd degree perineal tear at $\geq 24$ weeks gestation                                                                                                                                                                   |
| 3rd & 4th degree tear rate in non-instrumental vaginal births                       | The proportion of all women with a non-instrumental vaginal method of birth (not instrumental or caesarean) who sustained a 3rd or 4th degree perineal tear $\geq 24$ weeks gestation                                                                           |
| 3rd & 4th degree tear rate in assisted (instrumental or failed instrumental) births | The proportion of all women who had an assisted birth (instrumental or failed instrumental) who sustained a 3rd or 4th degree perineal tear $\geq 24$ weeks gestation                                                                                           |
| Episiotomy rate                                                                     | The proportion of all women who had an episiotomy at $\geq 24$ weeks gestation                                                                                                                                                                                  |
| Postpartum haemorrhage $\geq 1500$ ml                                               | The proportion of all women giving birth who had an estimated blood loss at birth $\geq 1500$ ml at any gestation                                                                                                                                               |
| Postpartum haemorrhage $\geq 2000$ ml                                               | The proportion of all women giving birth who had an estimated blood loss at birth $\geq 2000$ ml at any gestation                                                                                                                                               |
| Level 3 Critical Care                                                               | Proportion of women who gave birth in the recording period (for whom Provider Organisation was intrapartum lead provider) AND who received Level 3 care (antenatally or postnatally) anywhere in the Provider Organisation in that same period at any gestation |

|                                                                                         |                                                                                                                                                                                                                                                                 |
|-----------------------------------------------------------------------------------------|-----------------------------------------------------------------------------------------------------------------------------------------------------------------------------------------------------------------------------------------------------------------|
| Level 2 Critical Care                                                                   | Proportion of women who gave birth in the recording period (for whom Provider Organisation was intrapartum lead provider) AND who received Level 2 care (antenatally or postnatally) anywhere in the Provider Organisation in that same period at any gestation |
| All Maternal Deaths                                                                     | Number of maternal deaths                                                                                                                                                                                                                                       |
| Cases of Eclampsia                                                                      | Number of women with eclampsia                                                                                                                                                                                                                                  |
| Number of women transferred in utero at gestational age <34 weeks who don't deliver     | The proportion of women who are transferred as inpatients whilst still pregnant (in utero transfers) at gestational age <34 weeks who do not give birth on the admission following transfer.                                                                    |
| Number of women transferred in utero at gestational age ≥34 weeks who don't deliver     | The proportion of women who are transferred as inpatients whilst still pregnant (in utero transfers) at gestational age ≥34 weeks who do not give birth on the admission following transfer.                                                                    |
| Admission for maternal reasons within 42 days following birth                           | Number of women admitted postnatally for reasons relating to pregnancy/delivery/breast feeding within 42 days of delivery                                                                                                                                       |
| Number of women who return to theatre after a previous theatre episode within 48 hours. | Number of women who return to theatre post caesarean section within 48 hours of delivery                                                                                                                                                                        |
| Shoulder dystocia                                                                       | Proportion of babies born with shoulder dystocia                                                                                                                                                                                                                |
| Brachial plexus injuries                                                                | Proportion of babies born with brachial plexus injuries                                                                                                                                                                                                         |
| Postpartum hysterectomies including caesarean hysterectomies                            | Number of women having a hysterectomy within 6 weeks of giving birth (including caesarean hysterectomy).                                                                                                                                                        |
| Epidurals requested                                                                     | Proportion of women requesting epidural analgesia for labour                                                                                                                                                                                                    |
| Epidurals administered                                                                  | Proportion of women who received epidural analgesia in labour                                                                                                                                                                                                   |
| Vaginal breech deliveries in singleton pregnancies: a) <37 weeks and b) ≥37 weeks       | Proportion of Vaginal breech deliveries in singleton pregnancies in the following categories: ≥24 and <37 weeks and ≥37 weeks                                                                                                                                   |
| VBAC deliveries - Offered VBAC after single previous LSCS                               | Proportion of women offered vaginal birth after a single previous caesarean delivery.                                                                                                                                                                           |
| VBAC deliveries - Attempted VBAC delivery after single previous LSCS                    | Proportion of women attempted vaginal birth after a single previous caesarean delivery.                                                                                                                                                                         |
| VBAC deliveries - Achieved VBAC delivery after single previous LSCS                     | Proportion of women achieved vaginal birth after a single previous caesarean delivery.                                                                                                                                                                          |
| VBAC deliveries - complete uterine rupture                                              | Number of women with complete uterine rupture.                                                                                                                                                                                                                  |

|                                       |                                                                                                   |                                                                                                                              |
|---------------------------------------|---------------------------------------------------------------------------------------------------|------------------------------------------------------------------------------------------------------------------------------|
|                                       | GA for Category 1 Caesarean Section                                                               | Percentage of Category 1 Caesarean Sections which were performed under general anaesthesia.                                  |
|                                       | GA for Category 1-3 Caesarean Section                                                             | Proportion of Category 1-3 Caesarean Sections which were performed under general anaesthesia.                                |
|                                       | GA for Category 4 Caesarean Section                                                               | Proportion of Category 4 Caesarean Sections which are performed under general anaesthesia.                                   |
|                                       | WHO checklist                                                                                     | Proportion of women delivered in theatre who have a WHO surgical safety checklist fully completed at all appropriate stages. |
|                                       | Blood transfusions $\geq 4$ units                                                                 | Number of women who were transfused $\geq 4$ units of packed red cells                                                       |
|                                       | Maternal sepsis                                                                                   | Number of women diagnosed with Maternal Sepsis                                                                               |
|                                       | Transfer home from DS                                                                             | Proportion of women transferred home directly from the delivery suite after giving birth                                     |
|                                       | Average postnatal stay                                                                            | Average postnatal stay (days, hours)                                                                                         |
|                                       | Labour augmentation                                                                               | Proportion of women undergoing labour augmentation                                                                           |
| <b>Additional Metrics for Phase 2</b> | Maternal 'experience' of birth                                                                    | Maternal view of her birth experience                                                                                        |
|                                       | Spinal or Epidural anaesthetics for caesarean section that are converted to a general anaesthetic | Proportion of Spinal or Epidural anaesthetics for caesarean section that are converted to a general anaesthetic              |
|                                       | VTE assessment and intervention                                                                   | Proportion of women undergoing VTE assessment and receiving appropriate interventions                                        |
|                                       | Instrumental births requiring more than one type of instrument for successful delivery            | Proportion of instrumental births requiring more than one type of instrument for successful delivery                         |
|                                       | Fetuses at risk of IUGR monitored with GROW chart                                                 | Proportion of fetuses at risk of IUGR who are monitored using a GROW chart                                                   |
| <b>Neonatal Metrics</b>               | Born Before Arrival                                                                               | Number of babies born before arrival (BBA)                                                                                   |
|                                       | Spontaneous Preterm live birth rate <37 weeks                                                     | The proportion of live born babies who were born spontaneously at <37 weeks                                                  |
|                                       | Iatrogenic Preterm live birth rate <37 weeks                                                      | The proportion of live born babies who were born for iatrogenic reasons at <37 weeks                                         |
|                                       | Spontaneous Preterm live birth rate <34 weeks                                                     | The proportion of live born babies who were born spontaneously at <34 weeks                                                  |
|                                       | Iatrogenic Preterm live birth rate <34 weeks                                                      | The proportion of live born babies who were born for iatrogenic reasons at <34 weeks                                         |

|                                                                    |                                                                                                                                                                                                                                                           |
|--------------------------------------------------------------------|-----------------------------------------------------------------------------------------------------------------------------------------------------------------------------------------------------------------------------------------------------------|
| Spontaneous Preterm live birth rate <28 weeks                      | The proportion of live born babies who were born spontaneously at <28 weeks                                                                                                                                                                               |
| Iatrogenic Preterm live birth rate <28 weeks                       | The proportion of live born babies who were born for iatrogenic reasons at <28 weeks                                                                                                                                                                      |
| Spontaneous Preterm live birth rate <26 weeks                      | The proportion of live born babies who were born spontaneously at <26 weeks                                                                                                                                                                               |
| Iatrogenic Preterm live birth rate <26 weeks                       | The proportion of live born babies who were born for iatrogenic reasons at <26 weeks                                                                                                                                                                      |
| Low birth weight at term ( $\geq 37$ weeks) in live born babies    | The proportion of babies live born at term or over ( $\geq 37$ weeks) with a birth weight below the 10th centile                                                                                                                                          |
| Low birth weight at term ( $\geq 37$ weeks) in stillborn babies    | The proportion of all babies stillborn at term ( $\geq 37$ weeks) with a birth weight below the 10th centile.                                                                                                                                             |
| Babies born at term ( $\geq 37$ weeks) with Apgar < 4 at 5 minutes | The proportion of all babies born at term ( $\geq 37$ weeks) with an Apgar score <4 at 5 minutes.                                                                                                                                                         |
| Babies born at term ( $\geq 37$ weeks) that are actively cooled    | Proportion of all babies born at term that are actively cooled.                                                                                                                                                                                           |
| NICU admissions at term ( $\geq 37$ weeks)                         | The proportion of babies born at term ( $\geq 37$ weeks) requiring neonatal admission, regardless of source.                                                                                                                                              |
| Total NICU admissions                                              | The proportion of all babies born requiring neonatal admission, regardless of source.                                                                                                                                                                     |
| Stillbirths - Total                                                | The proportion of babies born at $\geq 24$ weeks gestation without signs of life (exclude late terminations or fetocide).                                                                                                                                 |
| Stillbirths at term ( $\geq 37$ weeks)                             | Proportion of babies born at term ( $\geq 37$ weeks) without signs of life (exclude late terminations or fetocide).                                                                                                                                       |
| Intrapartum stillbirths                                            | Proportion of babies $\geq 24$ weeks gestation known to be alive at the start of labour who are born without signs of life.                                                                                                                               |
| Antenatal stillbirths                                              | The proportion of babies born at $\geq 24$ weeks gestation without signs of life (exclude late terminations or fetocide), who were known to have died prior to onset of care in labour                                                                    |
| Antenatal stillbirths - adjusted to exclude lethal abnormalities   | The proportion of babies born at $\geq 24$ weeks gestation without signs of life (exclude late terminations or fetocide), who were known to have died prior to onset of care in labour, excluding those with lethal abnormalities incompatible with life. |
| Total Stillbirth rate – adjusted to exclude lethal abnormalities   | The proportion of babies born at $\geq 24$ weeks gestation without signs of life (exclude late terminations or fetocide), excluding those with lethal abnormalities incompatible with life.                                                               |
| Meconium aspiration                                                | Proportion of babies diagnosed with meconium aspiration syndrome                                                                                                                                                                                          |
| Neonatal deaths (<28 days)                                         | Proportion of live-born babies dying within the first 28 days following birth.                                                                                                                                                                            |
| Early neonatal deaths (<7 days)                                    | Proportion of liveborn babies dying within the first 7 days following birth.                                                                                                                                                                              |

|                                       |                                                                                                         |                                                                                                                                                    |
|---------------------------------------|---------------------------------------------------------------------------------------------------------|----------------------------------------------------------------------------------------------------------------------------------------------------|
|                                       | Late neonatal deaths (7-28 days)                                                                        | Proportion of liveborn babies dying between 7 and 28 days following birth.                                                                         |
|                                       | Babies delivered in non-Neonatal Intensive Care Unit between >23 weeks + 0 days and < 27 weeks + 6 days | Percentage of extreme preterm infants (>23 weeks + 0 days to < 27 weeks +6 days) delivered outside a hospital with a neonatal intensive care unit. |
|                                       | Number of term neonates with diagnosis of HIE graded 2 or 3                                             | Number of neonates with a diagnosis of neonatal encephalopathy grade 2 or 3 born at $\geq 37$ weeks                                                |
|                                       | Cord ph. < 7.05                                                                                         | Number of babies born with a Cord ph. < 7.05                                                                                                       |
|                                       | Number of neonates admitted to children's ward within 30 days of discharge from maternity ward          | Number of neonates admitted to paediatric ward within 30 days of discharge from maternity ward                                                     |
| <b>Additional Metrics for Phase 2</b> | Babies born at term ( $\geq 37$ weeks) with Apgar < 7 at 5 minutes                                      | Babies born at term ( $\geq 37$ weeks) with Apgar < 7 at 5 minutes                                                                                 |
|                                       | Baby check completed prior to discharge                                                                 | Proportion of babies having a completed baby check prior to discharge                                                                              |
|                                       | Transfer to named Health Visitor                                                                        | Proportion of infants who are transferred to a named Health Visitor                                                                                |
|                                       | Newborn sepsis                                                                                          | Proportion of babies diagnosed with sepsis                                                                                                         |
| <b>Public Health Metrics</b>          | Breastfeeding initiation rate (including home births)                                                   | The proportion of babies born who received any breast milk in the first 48 hours of life                                                           |
|                                       | Breastfeeding rate on transfer to health visitor (at 10-14 days)                                        | The proportion of babies born who were recorded as being totally or partially breastfed at time of transfer to the Health Visitor (10-14 days).    |
|                                       | Breastfeeding rate at 6-8 weeks                                                                         | The proportion of babies born who were recorded as being totally or partially breastfed at 6-8 weeks.                                              |
|                                       | Carbon monoxide (CO) testing                                                                            | Proportion of women CO tested at booking                                                                                                           |
|                                       | Smoking at delivery                                                                                     | Proportion of women who gave birth who reported themselves as smoking at the time of delivery                                                      |
|                                       | Smoking at booking                                                                                      | Proportion of women who gave birth who reported themselves as smoking at the time of booking                                                       |
|                                       | Obesity rates                                                                                           | Proportions of women with a Body Mass Index at the time of booking in the following categories: 30 to 34.9, 35 to 39.9, 40 to 49.9, 50 or more     |
|                                       | Rate of birth resulting from conceptions at under 18 years of age                                       | Proportion of women giving birth who were under 18 years of age when the baby was conceived                                                        |
|                                       | Rate of birth resulting from conceptions at under 20 years of age                                       | Proportion of women giving birth who were under 20 years of age when the baby was conceived                                                        |

|                                       |                                                                         |                                                                                                                                                  |
|---------------------------------------|-------------------------------------------------------------------------|--------------------------------------------------------------------------------------------------------------------------------------------------|
|                                       | Rate of birth resulting from conceptions in women aged 40 years or over | Proportion of women giving birth who were aged 40 years or over (40+) when the baby was conceived                                                |
|                                       | Proportion of women asked about female genital mutilation at booking    | Proportion of women at booking questioned about personal history of any form of female genital mutilation (FGM)                                  |
|                                       | Female genital mutilation rate - identified at booking                  | Proportion of women giving birth who had a personal history of any form of female genital mutilation (FGM) which was identified during booking.  |
|                                       | Female genital mutilation rate - identified at delivery                 | Proportion of women giving birth who had a personal history of any form of female genital mutilation (FGM) which was identified during delivery. |
|                                       | Universal maternal Pertussis immunisation programme                     | Proportion of women offered pertussis (whooping cough) information at booking                                                                    |
|                                       | Universal maternal Influenza Immunisation Programme                     | Proportion of women offered Influenza information at booking                                                                                     |
| <b>Additional Metrics for Phase 2</b> | Pre-existing diabetes                                                   | Proportion of women with pre-existing diabetes at booking                                                                                        |
|                                       | Gestational diabetes                                                    | Proportion of women that develop gestational diabetes mellitus                                                                                   |
|                                       | Postnatal follow up of gestational diabetes                             | Proportion of women diagnosed with gestational diabetes mellitus who are followed up postnatally for development of type 2 diabetes              |
|                                       | Interpretation services for non-English speaking women                  | Are interpretation services for non-English speaking women available?                                                                            |
|                                       | Alcohol consumption                                                     | Proportion of women asked about alcohol consumption at booking and given appropriate advice                                                      |
| <b>Workforce Metrics</b>              | Friends and family score - Antenatal                                    | Percentage of negative responses to the antenatal Friends and Family test                                                                        |
|                                       | Friends and family score - Postnatal                                    | Percentage of negative responses to the postnatal Friends and Family test                                                                        |
|                                       | 1:1 care during labour                                                  | Percentage of women who receive 1:1 care during established labour                                                                               |
|                                       | Weekly hours of Consultant cover on labour ward                         | Average Weekly hours of Consultant cover on labour ward                                                                                          |
|                                       | Midwifery workforce vacancies                                           | Average number of midwife vacancies in whole time equivalent (WTE)                                                                               |
|                                       | Sickness rate - Midwives                                                | Average number of midwives off sick (WTE)                                                                                                        |
|                                       | Sickness rate - Medical Staff                                           | Average number of medical staff off sick (WTE)                                                                                                   |
|                                       | Complaints in relation to maternity services                            | Number of complaints made                                                                                                                        |
| Reportable STEIS incidents            | Number of serious incidents reported                                    |                                                                                                                                                  |



Midwifery supervision

Average midwife to supervisor ratio

**Additional Metrics for Phase 2**

Continuity of midwifery through antenatal, intra-partum and post-partum care

Proportion of women who received their intra-partum and post-partum care from the same midwives that delivered their antenatal care

Complaints upheld

Number of complaints related to the quality of clinical care that are upheld

**Stratification factors for Phase 2**

Stratification by parity groups

Importance of stratifying appropriate indicators by parity groupings (e.g. primiparous, multiparous)

Stratification by multiplicity

Importance of stratifying appropriate indicators by multiplicity (singletons, twins, triplets etc.)

Stratification by gestational age

Importance of stratifying appropriate indicators by gestational age at delivery (e.g. Pre-term, term)

Stratification by Robson group

Importance of stratifying appropriate indicators by Robson group

---
