# Supplementary material for: Developing a set of consensus indicators to support maternity service quality improvement: using Core Outcome Set methodology including a Delphi process
Source: PubMed Central journal article supplement — BJOG. 2018 Jun 14;125(12):1612–8. doi: 10.1111/1471-0528.15282 (PMC6220866; doi:10.1111/1471-0528.15282), 2018-06-14
Supplement: BJO-125-1612-s002.pdf [file BJO-125-1612-s002.pdf]

**Table S2.** Experts invited to join the three panels

| <b>Panel</b>                                                              | <b>Numbers of participants invited</b> |
|---------------------------------------------------------------------------|----------------------------------------|
| <b>Service Design Panel</b>                                               | <b>26</b>                              |
| Academic experts                                                          | 3                                      |
| Government/National NHS/regulatory organisation representatives           | 23                                     |
| <b>Service Provision Panel</b>                                            | <b>64</b>                              |
| Consultant Obstetricians                                                  | 25                                     |
| Consultant Neonatologists                                                 | 5                                      |
| Consultant Anaesthetists                                                  | 2                                      |
| Consultant Psychiatrists                                                  | 2                                      |
| Midwives                                                                  | 23                                     |
| Research/Audit Clinicians                                                 | 2                                      |
| Ambulance Service                                                         | 2                                      |
| Other                                                                     | 3                                      |
| <b>Public Panel</b>                                                       | <b>11</b>                              |
| Users and representatives of organisations working in the maternity arena | 11                                     |
